# Supplementary material
Source: MDPI journal article supplement (https://www.mdpi.com/2673-4583/12/1/52)
Supplement: s1 [file s1]

Supplementary Materials

# Synthesis and X-ray Diffraction of Cyclopalladated Compounds Derived from Imine Ligands <sup>†</sup>

Basma Al Janabi <sup>\*</sup>, Juan M. Ortiueira and Jose Manuel Vila

Department of Inorganic Chemistry, Faculty of Chemistry, University of Santiago de Compostela, Avd. das Ciencias s/n, 15782 Santiago de compostela, Spain

<sup>\*</sup> Correspondence: basma.raad@usc.es

<sup>†</sup> Presented at the 26th International Electronic Conference on Synthetic Organic Chemistry, 1–15 November 2022; Available online: <https://sciforum.net/event/ecsoc-26>.

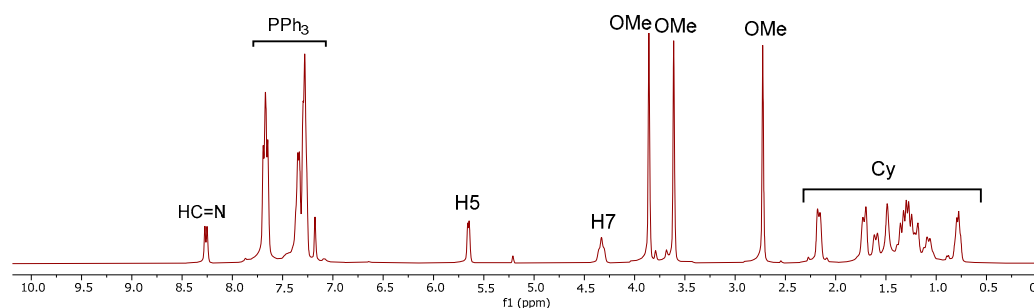

Figure S1. <sup>1</sup>H NMR of compound **1a** in CDCl<sub>3</sub>.

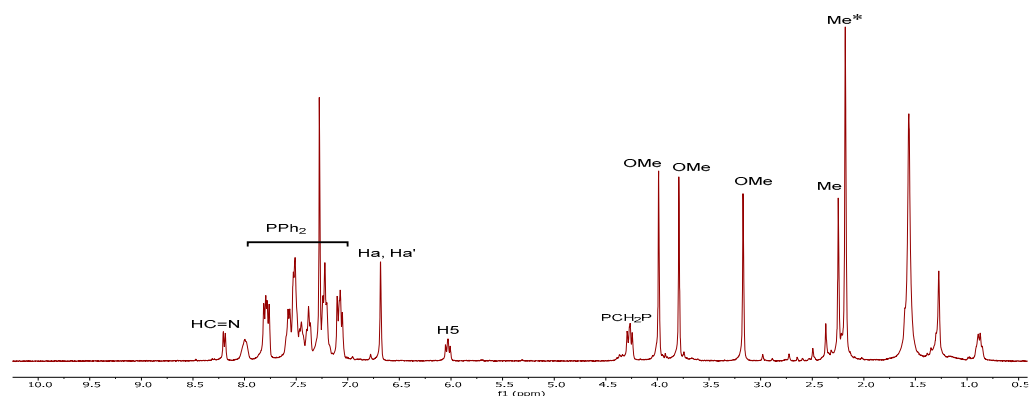

Figure S2. <sup>1</sup>H NMR of compound **1b** in CDCl<sub>3</sub>.

Table S1. Crystal data and structure refinement for compounds **1a** and **1b**.

| Crystal Structure | <b>1a</b>                                             | <b>1b</b>                                                                        |
|-------------------|-------------------------------------------------------|----------------------------------------------------------------------------------|
| Molecular formula | C <sub>34</sub> H <sub>37</sub> ClNO <sub>3</sub> PPd | C <sub>44</sub> H <sub>44</sub> F <sub>6</sub> NO <sub>3</sub> P <sub>3</sub> Pd |
| Formula weight    | 680.46                                                | 948.11                                                                           |
| Temperature/K     | 100.00                                                | 100.00                                                                           |
| Crystal system    | Orthorhombic                                          | monoclinic                                                                       |
| Space group       | P2 <sub>1</sub> /n                                    | P2 <sub>1</sub> /n                                                               |
| a/Å               | 22.5430 (14)                                          | 14.2798 (8)                                                                      |
| b/Å               | 9.7727 (5)                                            | 14.0263 (8)                                                                      |
| c/Å               | 13.6276 (9)                                           | 21.2483 (11)                                                                     |
| α/°               | 90                                                    | 90                                                                               |

|                                               |                                                               |                                                                 |
|-----------------------------------------------|---------------------------------------------------------------|-----------------------------------------------------------------|
| $\beta/^\circ$                                | 90                                                            | 98.393 (2)                                                      |
| $\gamma/^\circ$                               | 90                                                            | 90                                                              |
| Volume/ $\text{\AA}^3$                        | 3002.2 (3)                                                    | 4210.3 (4)                                                      |
| Z                                             | 4                                                             | 4                                                               |
| $\rho_{\text{calc}}/\text{g cm}^{-3}$         | 1.505                                                         | 1.496                                                           |
| $\mu/\text{mm}^{-1}$                          | 0.797                                                         | 0.622                                                           |
| F (000)                                       | 1400.0                                                        | 1936.0                                                          |
| Crystal size/ $\text{mm}^3$                   | $0.08 \times 0.03 \times 0.02$                                | $0.33 \times 0.07 \times 0.02$                                  |
| Radiation                                     | MoK $\alpha$ ( $\lambda = 0.71073$ )                          | MoK $\alpha$ ( $\lambda = 0.71073$ )                            |
| $\theta$ range for data collection/ $^\circ$  | 4.542 to 56.558                                               | 4.092 to 55.752                                                 |
| Index ranges                                  | $-30 \leq h \leq 30, -13 \leq k \leq 13, -18 \leq l \leq 18$  | $-18 \leq h \leq 18, -18 \leq k \leq 18, -27 \leq l \leq 25$    |
| Reflections collected                         | 120820                                                        | 91837                                                           |
| Independent reflections                       | 7453 [ $R_{\text{int}} = 0.0977, R_{\text{sigma}} = 0.0378$ ] | 10,043 [ $R_{\text{int}} = 0.0905, R_{\text{sigma}} = 0.0485$ ] |
| Data/restraints/parameters                    | 7453/1/373                                                    | 10,043/0/530                                                    |
| Goodness-of-fit on $F^2$                      | 1.047                                                         | 1.038                                                           |
| Final R indexes [ $I \geq 2\sigma(I)$ ]       | $R_1 = 0.0383, wR_2 = 0.0714$                                 | $R_1 = 0.0446, wR_2 = 0.0966$                                   |
| Final R indexes [all data]                    | $R_1 = 0.0524, wR_2 = 0.0786$                                 | $R_1 = 0.0641, wR_2 = 0.1068$                                   |
| Largest diff. peak/hole / $e \text{\AA}^{-3}$ | 0.64/−0.91                                                    | 1.54/−1.47                                                      |
| Flack parameter                               | 0.487(11)                                                     |                                                                 |
